# Supplementary material for: Need for and Access to Health Care and Medicines: Are There Gender Inequities?
Source: PLoS One. 2013 Mar 7;8(3):e57228. doi: 10.1371/journal.pone.0057228 (PMC3591435; doi:10.1371/journal.pone.0057228)
Supplement: Table S1 — Arthritis diagnosis and treatment. (XLSX) [file pone.0057228.s001.xlsx]

## Sheet: Table S1
Table S1. Arthritis diagnosis and treatment
	Sample size for adults (n)				Ever diagnosed with arthritis (%)				Diagnosis of arthritis based on reported symptoms in last 12 mos.				Ever treated for arthritis among adults ever diagnosed (%)				Received medication/other treatment for arthritis in past 2 weeks among adults ever diagnosed (%)
	All		Poor		All		Poor		All		Poor		All		Poor		All		Poor
	Female	Male	Female	Male	Female	Male	Female	Male	Female	Male	Female	Male	Female	Male	Female	Male	Female	Male	Female	Male
East Asia & Pacific
China	2039	1954	789	794	17.9752	12.3425	22.2394	15.2611	1.5517	0.655409	1.88957	1.0352	65.6243	68.2909	59.2941	59.0894	24.681	31.2662	28.2856	29.9878
Lao People's Democratic Republic	2594	2295	807	766	8.71277	7.28172	8.3269	7.12411	2.49425	2.38162	2.56854	2.43581	70.8939	72.4424	64.7429	70.0391	34.6554	31.8819	30.1176	28.893
Malaysia	3367	2673	1231	1059	9.64488	7.76226	10.687	9.06946	4.69988	3.35265	5.26213	3.34078	79.4926	74.9807	78.86	73.7214	52.5156	44.2138	52.8804	41.5496
Myanmar	3335	2551	1382	985	5.13466	3.37856	4.20223	2.9814	2.6524	1.97067	2.83493	2.55421	84.2229	87.2958	83.7665	80.3899	34.577	39.0587	27.8851	34.2811
Philippines	5417	4661	2082	1923	13.8411	11.4998	12.4517	10.227	10.6874	9.61928	10.6839	10.2319	49.0822	49.6476	41.4264	42.117	34.3798	31.5704	34.0446	30.7474
Viet Nam	1920	1572	768	628	9.31314	5.48793	7.66978	5.50702	2.63833	1.45443	2.89122	1.52627	93.9183	94.6241	89.526	93.9558	29.6022	26.7966	30.9105	35.3442
Europe & Central Asia
Bosnia-Herzegovina	594	434	248	161	17.9161	5.62564	15.8687	7.72602	13.78	6.76368	12.4764	9.44717	82.6044	79.3556	72.2138	70.6573	56.4571	47.4204	61.4486	27.6107
Croatia	589	401	234	146	14.743	9.30678	21.4995	13.0652	15.6916	11.228	19.3665	11.4654	88.5031	81.1028	88.8087	93.0746	60.4454	16.859	67.3829	34.0795
Czech Republic	516	419	218	148	22.9208	14.9975	33.0496	23.917	10.245	10.6687	11.4314	13.3329	79.4108	94.6055	73.7315	94.2498	55.8326	62.1066	60.435	55.0386
Estonia	645	367	267	136	25.015	16.1035	34.4743	20.3074	13.806	9.47023	17.5962	12.195	93.1159	95.378	91.0779	96.3953	45.1039	30.9132	49.5201	23.1025
Georgia	1588	1164	622	437	21.0007	13.4737	23.2537	15.9566	16.1227	8.19662	14.6044	9.71733	73.3129	73.2193	69.0652	65.952	38.863	32.5237	48.0811	35.4997
Hungary	828	591	342	209	28.8245	21.5375	33.1656	24.9478	19.0028	14.1023	24.6163	14.6599	92.6116	94.8349	92.2795	93.2788	42.5962	34.1263	51.2102	45.2403
Kazakhstan	2952	1544	1208	580	20.151	9.89315	19.9554	9.10432	12.0926	9.0999	12.0516	7.05964	89.5563	90.548	86.3909	90.8365	47.0326	52.9091	44.124	57.4302
Latvia	570	286	229	116	15.8864	9.90119	20.0787	11.7575	12.6881	5.99066	12.9072	6.53772	87.1765	82.3464	84.9399	92.6525	43.7554	58.4078	40.1677	56.1634
Russia	2828	1593	1175	561	25.218	15.6652	34.4394	18.4602	14.7466	11.3002	18.7817	13.8202	89.1971	94.4598	87.6706	97.5422	50.0368	50.1757	52.1396	49.2857
Slovakia	1542	967	495	205	14.7164	n/a	22.5664	17.1775	13.4798	n/a	18.8498	5.02326	91.9347	99.0282	92.6018	99.6332	74.3182	93.0739	76.8864	98.7087
Slovenia	314	271	130	105	10.6452	3.33333	18.6047	5.76923	9.26518	5.16605	12.3077	5.71429	87.8788	88.8889	83.3333	100	63.6364	44.4444	66.6667	66.6667
Spain	3740	2624	1506	1003	18.1717	9.19353	29.0487	13.6799	11.3108	5.78472	16.8104	10.0512	74.0824	68.3879	78.4165	69.3375	50.0617	37.443	59.6422	38.5189
Turkey	6416	4801	0	0	11.1416	4.14412	n/a	n/a	11.2047	5.00756	n/a	n/a	92.5849	84.5093	n/a	n/a	n/a	n/a	n/a	n/a
Ukraine	1813	988	662	306	22.3402	10.9006	25.8733	14.3245	13.5154	9.67471	15.4557	12.623	82.5477	76.7878	78.8612	79.9551	49.8403	46.1669	49.5092	40.7646
Latin America & Caribbean
Brazil	2812	2188	1062	859	12.125	6.94582	12.3784	8.04452	10.7593	6.27927	12.3178	7.65229	75.0606	71.0832	67.0914	60.1775	42.5957	33.7855	37.5873	21.6995
Dominican Republic	2430	2104	820	947	15.4875	7.31162	14.3399	8.61305	8.23328	3.21211	6.30973	4.51208	71.284	71.0496	67.5123	78.0639	16.1137	23.4284	16.1526	20.9267
Ecuador	2579	2045	908	774	10.3891	5.3749	12.8858	7.55845	9.32838	4.49648	9.68329	5.34391	64.6884	60.7747	56.335	54.1563	38.5827	29.9111	38.9956	23.1254
Guatemala	2937	1830	984	782	8.74827	6.54828	4.46058	4.81144	9.13133	7.19385	9.10952	8.48329	77.459	72.3214	71.4286	67.5676	25.9574	19.0909	12.1951	8.10811
Mexico	22369	16377	8909	6473	5.11548	2.25718	4.16339	2.33177	n/a	n/a	5.69876	n/a	70.6386	67.0316	71.0355	62.7961	42.7295	37.6212	39.6733	34.8307
Paraguay	2789	2354	1018	1032	4.95194	2.62778	3.55135	2.48914	12.3259	7.26837	15.0503	9.14421	83.9136	77.6556	75.7728	59.1906	28.4648	34.8546	12.5282	32.8654
Uruguay	1530	1447	564	610	14.0394	4.52982	19.6739	6.47033	10.2788	4.08695	11.7327	3.60006	81.603	68.8253	84.638	67.8579	46.5328	34.1993	51.465	22.7742
Middle East & North Africa
Morocco	2642	2074	860	768	19.4122	14.9586	19.1382	19.5877	15.2011	10.1666	18.0578	11.7302	96.248	90.592	94.0926	92.5436	18.0141	9.74409	9.88687	9.9438
Tunisia	2723	2342	1112	887	27.7401	18.4629	28.3889	18.89	9.35257	5.23361	11.8987	7.12545	79.9734	70.5098	78.6173	68.0708	36.2947	29.0621	29.0823	27.5725
United Arab Emirates	563	617	227	239	15.083	6.76931	15.7663	7.90165	5.20039	3.34473	5.19609	4.70905	90.5371	86.0575	93.071	90.5422	71.0498	48.3929	66.9378	54.9234
South Asia
Bangladesh	2968	2584	1264	954	11.0882	10.5394	11.1932	13.5066	8.95784	6.63052	8.97738	9.03164	91.436	84.2618	88.2435	82.9673	45.7031	41.3609	43.331	39.6913
India	5142	4843	2095	1904	24.9186	17.5161	25.2881	22.614	11.089	7.7229	11.8925	9.48935	59.122	56.0381	54.0899	53.5134	27.8167	23.5687	21.5218	20.5336
Nepal	4990	3698	1859	1247	16.8202	11.4391	18.3253	12.8214	17.4171	11.1555	17.8311	11.2383	35.5296	40.4861	24.9518	32.971	11.6531	11.1285	7.03461	10.6111
Pakistan	2812	3567	1107	1386	17.1808	9.70052	20.7027	10.7072	6.05586	1.89508	6.36718	1.85221	76.0624	72.9073	73.368	69.3148	45.4952	44.8917	34.9743	31.2778
Sri Lanka	3596	3136	1436	1212	8.91853	3.93512	11.1293	4.56741	5.67019	3.09807	5.616	2.84544	89.397	93.6289	93.1608	90.8015	56.5914	51.0896	51.1736	47.5638
Sub-Saharan Africa
Burkina Faso	2550	2272	987	919	14.0592	11.1739	14.923	10.6732	4.43281	3.46235	3.7489	2.79907	62.6122	63.8262	60.1727	60.658	23.3625	20.6534	20.6464	20.5849
Chad	2453	2195	1049	721	36.1684	29.5731	37.8185	28.4065	4.3152	4.64073	3.98403	5.26542	34.9245	40.2475	22.5918	26.9679	18.3176	22.0663	13.2453	10.1751
Comoros	972	786	382	292	16.5621	9.83003	14.6409	12.2733	4.98951	3.35429	4.19923	2.71334	56.5577	61.992	38.7369	57.8807	29.3397	27.2685	27.5787	21.3596
Congo	1325	1165	499	459	18.3059	16.456	21.4944	25.9289	4.86458	4.5759	1.89919	8.92667	54.8981	60.4676	35.6143	52.7996	41.6325	44.9571	34.4295	43.209
Cote d Ivoire	1363	1815	531	677	15.3996	10.1923	19.2804	11.1764	3.80806	2.63364	5.32499	3.769	54.2983	70.84	47.1908	65.0247	32.9178	37.8195	24.8005	39.9454
Ethiopia	2546	2392	980	936	25.4754	19.375	24.6747	20.5737	8.38815	6.38821	8.29381	6.34142	37.1604	54.5815	31.488	49.3121	n/a	n/a	n/a	n/a
Ghana	2160	1772	845	655	8.37359	5.61305	8.3884	6.15461	7.76066	5.09629	8.48248	7.20762	75.4422	79.8196	69.2728	68.8836	39.8538	39.4124	23.4324	46.6562
Kenya	2546	1870	1041	714	5.06013	3.18198	7.77156	5.49353	5.44114	2.05422	5.67798	2.87046	80.206	87.2189	73.9802	87.6936	20.3413	22.9234	16.0287	17.1569
Malawi	3089	2210	1245	810	34.8146	29.6395	34.6644	32.0261	4.43087	4.60165	4.86393	4.9087	74.7824	81.5962	76.9	78.567	19.7127	21.4858	19.9096	17.6626
Mali	1812	2420	716	875	17.6116	11.7106	16.0903	14.3817	2.06683	1.72929	1.78198	0.764481	55.9887	68.4015	50.3563	64.4151	23.788	18.458	16.2682	20.7703
Mauritania	2291	1457	877	433	26.1723	14.0128	38.1639	25.4696	8.04794	4.75171	14.7269	8.5154	54.6555	54.2794	56.1062	59.9036	43.2073	44.3553	48.066	50.0799
Mauritius	2016	1872	831	706	10.1799	4.25538	12.0603	4.26229	7.12849	4.17762	8.9058	4.81927	79.6787	90.5273	84.8269	97.3144	55.2576	40.3074	55.4316	50.005
Namibia	2525	1723	995	617	10.8664	9.24319	10.7007	8.10867	2.69348	2.00372	2.43352	1.38321	70.8938	79.3231	60.1231	55.599	46.336	55.7065	41.1591	32.4486
Senegal	1534	1663	517	551	21.5615	14.9038	23.0265	16.4583	6.34802	5.23243	6.50114	5.1749	48.888	54.1475	40.9234	44.4796	33.2918	36.6058	26.7793	31.7978
South Africa	1219	1105	464	403	13.5201	6.116	15.0454	6.90163	5.22818	4.00281	6.05437	4.22323	79.1297	70.4412	74.5018	54.3938	62.3749	53.085	57.1719	51.786
Swaziland	1666	1404	627	480	n/a	n/a	11.0168	n/a	6.00197	n/a	5.39809	n/a	68.5307	55.3587	59.9541	63.2756	58.7037	45.6031	55.0743	56.9706
Zambia	2089	1722	911	670	4.65306	3.79145	5.80102	4.87026	1.6961	1.36401	1.5868	0.999345	68.5308	62.9728	66.1526	51.1216	46.2233	30.2667	43.239	15.0862
Zimbabwe	2593	1479	1038	550	6.37515	4.4665	5.26499	5.53435	1.94958	1.56118	1.72377	1.25316	61.2227	68.4651	60.7443	45.9495	21.8581	21.1515	10.9512	3.67227
