# Supplementary material for: Need for and Access to Health Care and Medicines: Are There Gender Inequities?
Source: PLoS One. 2013 Mar 7;8(3):e57228. doi: 10.1371/journal.pone.0057228 (PMC3591435; doi:10.1371/journal.pone.0057228)
Supplement: Table S2 — Angina diagnosis and treatment. (XLSX) [file pone.0057228.s002.xlsx]

## Sheet: Table S2
Table S2. Angina diagnosis and treatment
	Sample size for adults (n)				Ever diagnosed with angina (%)				Diagnosis of angina based on reported symptoms in last 12 mos.				Ever treated for angina among adults ever diagnosed (%)				Received medication/other treatment for angina in past 2 weeks among adults ever diagnosed (%)
	All		Poor		All		Poor		All		Poor		All		Poor		All		Poor
	Female	Male	Female	Male	Female	Male	Female	Male	Female	Male	Female	Male	Female	Male	Female	Male	Female	Male	Female	Male
East Asia & Pacific
China	2039	1954	789	794	2.50066	1.70766	3.21306	2.08684	3.91095	2.95826	7.86933	5.43116	83.5221	85.3772	84.6703	100	49.8718	53.7444	28.0352	72.0294
Lao People's Democratic Republic	2594	2295	807	766	5.54148	3.85378	6.08812	5.31996	4.73567	4.86935	6.45983	6.47449	66.0955	57.8543	53.9977	51.0274	26.8625	25.3432	26.4793	21.3241
Malaysia	3367	2673	1231	1059	3.19703	3.6059	3.68329	3.36887	10.4404	8.58525	14.0479	10.5855	83.8415	85.2942	88.0988	84.5724	61.3099	58.7346	57.9284	38.5564
Myanmar	3335	2551	1382	985	3.56916	1.84266	2.84493	1.31927	3.26287	2.31927	3.20286	2.54307	68.5036	32.2109	51.4697	40.0009	13.6717	23.1014	5.33805	16.5386
Philippines	5417	4661	2082	1923	6.78408	4.36597	8.36468	3.58005	15.5926	11.8334	19.4976	14.8224	67.9645	69.9613	59.2082	48.6213	29.797	41.2165	28.5704	26.9651
Viet Nam	1920	1572	768	628	5.28038	2.81706	5.69674	3.32462	4.96348	2.96751	5.84189	4.44136	80.8208	97.4637	84.0667	97.9112	37.6371	46.5086	29.7961	36.2919
Europe & Central Asia
Bosnia-Herzegovina	594	434	248	161	8.94325	6.90324	8.73407	11.5234	10.0855	8.69693	11.6281	13.0493	96.7498	93.2088	100	93.7853	85.2055	84.293	99.4526	83.2276
Croatia	589	401	234	146	8.4571	7.27896	14.1584	11.1988	23.3871	16.7738	34.25	27.6292	93.9664	97.9363	95.6121	100	87.6507	90.1443	87.5051	97.61
Czech Republic	516	419	218	148	6.39908	6.42128	12.2372	12.388	14.3356	11.2865	20.7121	19.5884	98.4411	99.3683	98.2769	99.0316	71.4117	82.2088	68.3988	77.1801
Estonia	645	367	267	136	19.7294	11.3677	32.1652	14.8279	15.0423	10.7507	22.8726	17.3446	94.3991	90.4913	96.2825	91.0335	62.6421	50.2523	69.3217	49.113
Georgia	1588	1164	622	437	15.3697	11.6158	16.3158	11.2858	21.4416	14.9376	23.7204	14.4139	87.3414	88.8264	84.5336	83.8011	51.66	57.9804	50.5794	54.9777
Hungary	828	591	342	209	20.3814	12.3442	28.1208	17.6166	16.7503	9.95974	21.1317	12.2142	89.6047	91.6599	86.9206	95.0287	63.7135	73.5447	66.7384	71.3133
Kazakhstan	2952	1544	1208	580	13.9915	9.3962	15.0603	6.40961	14.4819	9.77881	17.7297	8.34428	94.8967	96.9565	93.0065	97.0431	59.7711	67.3404	62.3167	72.3749
Latvia	570	286	229	116	22.3162	14.7166	29.4801	17.4973	13.9987	6.54333	15.5791	10.6062	92.6179	93.3448	92.0323	86.3606	60.1891	69.2048	56.0217	54.4091
Russia	2828	1593	1175	561	28.4791	20.8557	41.5554	28.6454	20.6707	14.3619	29.2542	20.3069	95.5528	79.8684	94.829	74.8373	82.5254	72.6368	79.3485	82.5187
Slovakia	1542	967	495	205	6.69535	n/a	10.05	22.421	21.8401	n/a	30.7276	21.1879	86.5476	96.7043	84.6407	96.3787	71.0581	94.5259	79.2665	98.7528
Slovenia	314	271	130	105	19.8718	20.6767	20.7692	20.1923	16.2939	12.9151	16.1538	20.9524	96.7742	98.1818	92.5926	100	29.0323	37.037	33.3333	38.0952
Spain	3740	2624	1506	1003	2.90715	4.81795	5.71023	8.11921	4.18769	2.89556	6.32134	5.68283	93.1725	92.1748	92.2678	98.3012	71.391	68.6931	67.8672	85.1397
Turkey	6416	4801	0	0	5.97237	4.86759	n/a	n/a	0	0	n/a	n/a	90.3409	88.5046	n/a	n/a	n/a	n/a	n/a	n/a
Ukraine	1813	988	662	306	23.7103	13.1838	27.0501	12.7261	16.2178	9.46072	18.6689	11.048	91.0854	88.2602	89.7261	90.4064	63.7139	56.2042	65.502	58.2392
Latin America & Caribbean
Brazil	2812	2188	1062	859	6.27487	6.08661	6.93365	6.38265	7.4907	4.12226	8.22889	5.72959	72.7571	71.8951	66.041	66.4752	50.155	40.3232	44.3166	30.3521
Dominican Republic	2430	2104	820	947	4.76367	2.85009	4.01973	3.0257	11.3904	7.65496	11.0056	10.5382	66.9699	78.3595	47.3317	60.3928	36.0425	48.6103	21.2735	15.4579
Ecuador	2579	2045	908	774	4.88345	3.57223	4.8197	3.72686	6.26789	3.97973	7.65581	5.66873	52.838	47.5767	22.8253	36.4459	25.5488	30.3688	16.8648	25.7208
Guatemala	2937	1830	984	782	5.88643	2.66075	3.62319	1.67959	3.60577	2.26145	3.28542	3.10881	68.7117	76.5957	57.1429	75	31.0559	33.3333	11.7647	8.33333
Mexico	22369	16377	8909	6473	2.20662	1.79249	1.63108	1.70896	n/a	n/a	5.83386	n/a	74.6794	73.1842	66.8147	66.7616	63.0131	64.6944	n/a	52.8996
Paraguay	2789	2354	1018	1032	7.38444	3.38455	7.99997	2.68986	15.4426	6.87315	17.5317	8.70229	79.4258	75.5148	65.5185	55.0816	33.5442	26.3441	22.7166	6.7368
Uruguay	1530	1447	564	610	5.64126	5.70739	5.99873	6.31877	7.19715	4.09382	10.1045	5.44158	89.039	91.538	92.1794	89.3365	40.4841	36.5605	43.0113	34.036
Middle East & North Africa
Morocco	2642	2074	860	768	6.83076	3.29402	6.99625	3.5402	22.7691	15.0619	27.8692	17.5274	86.1705	91.0941	80.4026	87.7808	25.5384	23.539	7.63707	10.9026
Tunisia	2723	2342	1112	887	2.18413	1.49578	2.65757	0.990064	17.762	10.9711	20.176	10.754	95.8695	95.8768	96.15	100	64.1016	58.9791	59.3327	53.0041
United Arab Emirates	563	617	227	239	2.4674	5.59906	3.16122	6.73686	5.34755	5.07329	6.30969	7.07507	79.5709	92.2153	76.4122	100	58.0436	73.5992	76.4122	100
South Asia
Bangladesh	2968	2584	1264	954	7.19946	6.14635	5.9237	4.95364	16.8509	9.46038	20.3392	12.6682	79.1153	78.0388	66.2188	70.2258	34.8621	45.4941	31.9426	32.732
India	5142	4843	2095	1904	8.48406	7.45922	8.1806	8.50272	17.6547	12.8638	20.6332	15.5404	68.0449	70.0918	66.0748	65.6726	32.3825	33.2328	32.299	30.7113
Nepal	4990	3698	1859	1247	5.76462	5.32174	5.03132	3.30499	4.78724	4.37261	6.51169	5.92121	74.4298	75.1087	76.669	66.5436	17.6658	16.8967	11.5118	19.1011
Pakistan	2812	3567	1107	1386	3.76497	2.39608	4.46284	2.1423	9.53525	5.68795	10.7166	6.90353	51.2122	74.2563	52.4776	67.1883	24.0998	51.0537	26.329	11.8278
Sri Lanka	3596	3136	1436	1212	2.83222	3.01964	2.95382	3.72522	7.24091	5.08065	10.0631	7.76696	90.2555	92.7112	84.7223	83.4033	65.4546	73.3375	69.4003	62.7746
Sub-Saharan Africa
Burkina Faso	2550	2272	987	919	14.5942	8.68616	13.5369	6.47406	16.6486	9.15227	17.8153	8.37826	56.9267	65.7173	53.6542	57.3228	24.7868	24.0636	22.9493	22.1305
Chad	2453	2195	1049	721	22.3461	20.4333	22.5779	19.5524	12.981	10.2584	14.9026	9.94393	31.3866	43.8662	19.0997	29.7396	15.2261	23.3563	9.28819	16.3921
Comoros	972	786	382	292	6.05601	3.31637	2.7299	3.30944	13.0215	7.99879	12.3679	11.6332	76.5064	53.4059	73.2347	39.1941	29.7505	14.8521	37.6014	30.7985
Congo	1325	1165	499	459	9.13624	8.67416	11.7374	8.73944	4.50518	2.1969	4.96304	2.19042	62.6281	61.3301	57.3464	69.2098	62.1264	56.8063	65.2214	70.2972
Cote d Ivoire	1363	1815	531	677	9.37197	6.41218	11.2749	7.13766	6.88981	4.76031	8.35659	5.54395	57.7864	46.8558	46.9533	32.6736	27.7264	27.716	28.0285	22.5839
Ethiopia	2546	2392	980	936	16.804	12.5508	15.4642	14.4376	28.4608	19.3833	34.2617	26.016	32.6615	42.1675	25.1544	39.9514	n/a	22.5583	n/a	17.8657
Ghana	2160	1772	845	655	6.89797	2.1995	8.39376	2.25552	9.46413	5.31807	9.5171	7.20105	75.068	74.6987	51.2516	91.1671	24.7774	33.432	10.2393	51.9218
Kenya	2546	1870	1041	714	2.86509	2.00432	3.75771	0.826066	12.6501	9.61428	17.3746	13.6267	65.8248	93.6043	60.3751	73.0035	14.1139	39.9039	8.93651	58.2774
Malawi	3089	2210	1245	810	20.0728	8.2954	22.6907	9.55762	16.7697	12.1353	22.4543	16.3049	63.4201	68.1412	61.2217	65.7584	13.137	15.1497	10.7871	20.273
Mali	1812	2420	716	875	11.0445	7.97152	8.45673	6.812	4.47404	2.39446	4.62003	2.54099	58.0217	65.3975	50.461	63.6961	23.5335	17.7311	20.049	11.783
Mauritania	2291	1457	877	433	8.64783	5.29648	11.0895	8.22076	6.51087	3.57685	6.64859	3.60779	50.6899	58.903	44.2344	52.1963	34.4857	48.8508	32.8796	50.7389
Mauritius	2016	1872	831	706	4.52433	3.92786	5.26369	4.12836	11.2824	4.54315	13.5848	5.55558	97.4605	96.2288	100	94.3467	78.3431	80.3901	84.404	73.9691
Namibia	2525	1723	995	617	9.15612	6.05379	11.918	8.02209	7.72923	4.57239	9.05052	6.50379	69.3996	72.4381	62.1213	65.8265	41.2448	40.6939	28.5586	36.951
Senegal	1534	1663	517	551	13.1022	6.24425	15.7804	7.22422	9.59447	4.80497	11.1625	4.14246	53.2092	56.2577	49.9727	73.1914	33.894	46.6116	37.643	60.3995
South Africa	1219	1105	464	403	6.7656	2.37079	7.23288	2.01404	11.9694	6.70783	17.0193	7.54407	72.4617	76.4415	76.89	74.1689	38.684	46.1622	43.1908	31.0936
Swaziland	1666	1404	627	480	n/a	n/a	11.6809	n/a	13.1957	n/a	12.0974	n/a	56.4985	59.915	51.2077	62.1991	45.3747	51.3347	39.4189	58.2619
Zambia	2089	1722	911	670	3.23954	2.25375	3.30736	1.81645	5.92546	5.19633	7.39878	7.11178	58.8476	72.2879	58.6368	55.0123	25.9968	20.6258	31.9017	18.4714
Zimbabwe	2593	1479	1038	550	8.25421	3.20778	8.07721	3.46276	11.7815	4.67376	12.9492	5.72879	67.7528	74.277	64.0525	77.3681	17.4803	29.6902	10.5124	39.9893
