# Supplementary material for: Need for and Access to Health Care and Medicines: Are There Gender Inequities?
Source: PLoS One. 2013 Mar 7;8(3):e57228. doi: 10.1371/journal.pone.0057228 (PMC3591435; doi:10.1371/journal.pone.0057228)
Supplement: Table S4 — Depression diagnosis and treatment. (XLSX) [file pone.0057228.s004.xlsx]

## Sheet: Table S4
Table S4. Depression diagnosis and treatment
	Sample size for adults (n)				Ever diagnosed with depression (%)				Diagnosis of depression based on reported symptoms in last 12 mos.				Ever treated for depression among adults ever diagnosed (%)				Received medication/other treatment for depression in past 2 weeks among adults ever diagnosed (%)
	All		Poor		All		Poor		All		Poor		All		Poor		All		Poor
	Female	Male	Female	Male	Female	Male	Female	Male	Female	Male	Female	Male	Female	Male	Female	Male	Female	Male	Female	Male
East Asia & Pacific
China	2039	1954	789	794	0.402087	0.161625	0.404724	0.477923	1.19073	0.623699	2.31591	1.32096	58.6467	28.9676	27.8982	28.9676	48.704	28.9676	15.7852	28.9676
Lao People's Democratic Republic	2594	2295	807	766	1.94173	1.82663	2.10442	2.10699	1.34784	0.750044	1.57864	0.881664	57.7345	45.1301	61.6829	64.2158	38.2803	27.774	38.5252	31.859
Malaysia	3367	2673	1231	1059	3.2976	1.8571	3.98743	1.65841	1.44518	1.09761	1.97927	1.21065	45.5469	24.284	46.9164	26.3685	27.583	20.9299	26.5023	20.9217
Myanmar	3335	2551	1382	985	0.538455	0.467401	0.272329	0.543014	0.619559	0.296793	0.67304	0.314739	54.6864	50.5473	51.0662	61.5438	18.9177	4.75423	0	12.1946
Philippines	5417	4661	2082	1923	4.01181	3.37625	5.08834	2.83677	2.76135	1.83461	4.19122	2.00622	27.9412	34.0914	25.42	26.5202	15.4356	15.0604	11.537	14.876
Viet Nam	1920	1572	768	628	0.129919	0.135858	0.0899152	0.307238	0.631686	0.0578884	0.891849	0.169076	82.7089	76.849	100	69.9888	0	53.9901	0	69.9888
Europe & Central Asia
Bosnia-Herzegovina	594	434	248	161	9.20083	3.46419	9.73585	4.92242	6.53949	1.96696	4.0871	2.48706	72.8446	91.2155	84.2552	100	50.5271	46.492	71.0416	64.285
Croatia	589	401	234	146	5.01879	5.71416	7.81573	6.58106	6.11142	4.35016	12.3546	6.15042	93.8057	97.3173	94.5459	100	63.2754	78.7637	71.2187	100
Czech Republic	516	419	218	148	8.77646	2.63931	11.1705	2.5894	5.80014	2.3465	6.8112	5.40288	72.4106	30.0269	70.5758	20.8284	36.643	11.7951	32.2885	4.95851
Estonia	645	367	267	136	10.3077	6.96422	10.7161	9.06843	8.35774	4.74063	11.0898	5.83321	83.0646	73.5117	77.3292	87.2926	31.6472	26.7118	29.2791	36.9572
Georgia	1588	1164	622	437	6.27625	4.30439	7.10791	4.89383	6.42294	2.7018	9.51257	3.51965	65.5388	43.5185	62.2345	74.9901	28.449	25.0975	29.3876	55.8241
Hungary	828	591	342	209	11.7305	4.58544	13.7198	6.48766	5.75696	2.17839	8.09625	4.3166	92.745	84.4463	94.5391	82.0073	54.6682	43.259	66.2396	59.2843
Kazakhstan	2952	1544	1208	580	1.71491	1.41892	2.13146	1.37142	4.87128	2.73816	3.54428	1.62814	72.596	76.125	66.3088	71.6889	23.3167	28.0162	23.9956	17.741
Latvia	570	286	229	116	8.19476	2.89093	11.3273	2.84989	5.81139	5.10567	8.49791	8.25641	71.5941	100	67.8008	100	48.3458	54.3736	39.8312	56.8014
Russia	2828	1593	1175	561	4.72918	1.11761	2.30402	1.34792	5.54933	2.95981	6.40363	4.69157	89.1624	32.0479	92.6763	54.9582	26.4513	11.0381	55.2545	17.6217
Slovakia	1542	967	495	205	1.88768	n/a	1.43881	0.702997	6.72876	1.00176	9.62563	0.678848	74.7762	70.0635	80.5014	100	58.6057	55.8815	62.9106	55.328
Slovenia	314	271	130	105	7.07395	3.32103	10.1562	3.80952	6.39731	2.34375	10.4	5	81.8182	77.7778	84.6154	75	54.5455	66.6667	76.9231	50
Spain	3740	2624	1506	1003	19.2387	8.04146	25.7985	10.2323	11.5677	4.34841	17.9697	6.65101	84.5349	76.462	79.4683	76	45.0309	38.7131	49.148	43.455
Turkey	6416	4801	0	0	10.1	3.25377	n/a	n/a	0	0	n/a	n/a	95.6424	90.8223	n/a	n/a	n/a	n/a	n/a	n/a
Ukraine	1813	988	662	306	4.54165	2.63462	5.163	3.11762	8.97424	4.25631	11.8712	3.84975	52.9362	32.6772	56.7062	18.1405	32.0851	15.7297	41.5209	10.2021
Latin America & Caribbean
Brazil	2812	2188	1062	859	25.1438	12.3129	22.5011	10.4964	21.4582	9.88886	22.1344	10.6112	71.049	61.4621	62.7065	56.5901	35.9081	26.3005	30.0886	24.8856
Dominican Republic	2430	2104	820	947	13.6668	3.4482	9.01938	3.77363	10.1432	5.29021	12.8785	5.89478	70.0255	64.1318	67.4841	51.7649	12.2851	18.0487	8.28128	13.1774
Ecuador	2579	2045	908	774	8.75247	3.07075	8.77522	3.34862	6.24663	3.88667	6.79989	4.89849	54.1331	46.7058	41.8079	43.1281	22.7096	26.6084	20.6021	14.2201
Guatemala	2937	1830	984	782	5.64991	1.6138	1.45078	0.518135	12.4467	6.60025	12.3239	8.9153	69.6774	66.6667	53.8462	25	24.4898	30.7692	15.3846	0
Mexico	22369	16377	8909	6473	7.12631	2.20323	4.46205	1.64137	8.15225	3.4523	8.58156	4.12588	62.7751	63.1475	52.4459	59.1829	23.842	24.4092	18.3934	17.8609
Paraguay	2789	2354	1018	1032	10.0596	3.26712	5.20857	1.44151	8.4031	2.68459	7.92898	2.40462	76.3929	85.5311	65.3806	90.091	25.4205	33.2448	21.3726	31.3886
Uruguay	1530	1447	564	610	14.6415	5.99543	17.9006	5.97077	6.67456	2.61311	9.40489	3.96143	77.6656	80.9789	69.9177	67.402	37.0739	51.2997	37.9273	25.3388
Middle East & North Africa
Morocco	2642	2074	860	768	3.84703	2.14758	1.55278	1.69651	21.3873	14.9307	21.0496	15.1479	85.3376	89.5243	88.8239	92.0369	21.5362	44.9523	12.709	26.1027
Tunisia	2723	2342	1112	887	5.91676	4.09838	3.25736	3.80613	8.37001	6.67811	9.93304	8.03445	58.4005	45.5676	43.6724	57.2165	29.6123	26.584	11.4011	28.3234
United Arab Emirates	563	617	227	239	4.2442	3.01007	5.92811	6.59933	4.45336	4.16435	6.09107	7.1927	66.3337	58.5495	41.7923	74.6914	45.2039	36.92	36.5561	49.356
South Asia
Bangladesh	2968	2584	1264	954	1.60834	1.06568	1.81088	1.05384	13.3567	6.99413	15.6692	8.22893	38.5587	47.5228	27.2336	26.2969	15.4801	16.8601	16.2076	28.7225
India	5142	4843	2095	1904	13.9372	11.7987	13.8717	12.4131	10.3832	7.87084	11.4557	8.41836	13.7647	11.4593	9.55906	7.16523	4.86043	5.47473	3.22656	3.19249
Nepal	4990	3698	1859	1247	33.7555	33.4335	31.7511	32.0257	11.7432	6.96658	13.5377	9.11801	2.24168	4.21942	0.777526	2.26018	n/a	n/a	n/a	n/a
Pakistan	2812	3567	1107	1386	3.33002	1.7735	2.76656	1.88916	8.29643	3.50921	7.56171	3.68164	53.098	54.4984	43.156	50.9196	37.2293	29.821	34.2501	34.6487
Sri Lanka	3596	3136	1436	1212	1.10432	1.10519	0.742009	1.34033	1.4039	1.74198	2.96496	2.73502	48.9246	70.869	65.2963	61.4203	23.7665	53.3906	37.4831	45.3701
Sub-Saharan Africa
Burkina Faso	2550	2272	987	919	2.67044	2.60457	1.85257	1.80561	7.9423	5.75175	7.87211	6.25866	44.2113	33.6521	51.689	31.8732	33.0315	15.8899	47.0688	20.7406
Chad	2453	2195	1049	721	2.16043	2.172	2.03013	1.98042	11.8278	7.91739	12.9774	7.68244	52.9028	46.3919	62.9976	49.179	36.195	32.2299	51.6542	34.6867
Comoros	972	786	382	292	1.88488	1.17594	2.0463	0.81698	6.31352	3.6887	7.21912	3.1667	49.8385	53.3373	45.6048	0	26.4804	22.1393	50.163	0
Congo	1325	1165	499	459	6.15385	5.84009	6.35229	8.05624	15.4521	9.5684	14.1555	12.3208	87.7389	77.0736	73.8829	64.3392	84.2272	63.3981	70.1366	78.6327
Cote d Ivoire	1363	1815	531	677	2.15745	1.3265	2.55321	1.06631	6.14539	3.5872	7.2387	2.112	57.9418	42.5505	45.5352	31.9217	35.951	20.4696	29.7698	31.9217
Ethiopia	2546	2392	980	936	4.1635	4.6297	2.55659	4.5538	6.55117	5.82932	9.75978	8.24541	19.2087	10.6672	21.7887	7.0801	n/a	n/a	n/a	n/a
Ghana	2160	1772	845	655	1.64259	1.32537	2.4502	1.88278	6.93392	4.00117	7.58546	6.02513	22.1632	53.4753	15.9511	43.9001	6.55583	26.0463	0	4.64873
Kenya	2546	1870	1041	714	5.39167	5.539	5.24464	4.50093	10.2465	6.73442	11.1572	11.1012	68.1553	77.817	51.1054	53.4018	7.61969	0.62148	7.51831	2.41001
Malawi	3089	2210	1245	810	1.50966	1.05249	1.1492	0.312418	6.70508	3.3802	8.46768	4.62238	49.3633	41.1607	49.1804	83.15	12.7392	14.7228	6.64097	0
Mali	1812	2420	716	875	1.43116	0.884931	1.70606	0.849294	5.17261	2.50144	5.26343	4.66965	62.3424	65.8188	66.1879	34.5305	27.7573	43.8553	10.9878	13.1307
Mauritania	2291	1457	877	433	3.32668	2.18845	3.42657	1.73302	4.55622	3.3608	4.02723	1.81493	75.9118	76.8081	66.285	78.387	60.4152	56.1297	32.7465	74.6257
Mauritius	2016	1872	831	706	8.98907	3.56111	10.9604	5.13421	10.63	4.53386	13.2216	6.93275	66.5603	76.3705	63.0672	90.4704	41.5881	44.6501	42.1215	54.8126
Namibia	2525	1723	995	617	9.63523	5.55255	12.8416	6.97922	5.58249	4.01274	6.88347	6.4559	37.4225	39.2229	27.3065	42.0311	30.9459	30.177	29.6476	42.3573
Senegal	1534	1663	517	551	2.12424	1.24343	1.74633	1.77768	6.04515	3.93098	8.10073	3.14006	54.8806	87.5347	14.6405	94.6599	33.3372	28.7258	45.8568	7.04259
South Africa	1219	1105	464	403	10.5439	7.36162	9.5822	7.39094	5.18056	3.04792	5.56988	4.05841	49.237	28.688	34.1122	13.6433	29.98	14.9696	29.4704	13.2519
Swaziland	1666	1404	627	480	23.6466	n/a	25.2837	n/a	6.98676	5.47375	7.80101	6.4273	42.7993	46.9324	36.2974	52.4268	36.6938	35.2502	28.3158	38.9998
Zambia	2089	1722	911	670	2.79143	1.07128	2.69724	0.913229	7.16029	5.46771	6.97397	4.08644	46.6582	9.09434	23.4337	27.8411	25.9949	9.09434	11.9983	27.8411
Zimbabwe	2593	1479	1038	550	8.24637	4.75869	7.25441	4.10404	3.76755	1.60835	3.32989	2.2521	16.3927	14.5279	16.0066	18.3954	9.80328	9.95352	14.9932	18.585
