# Supplementary material for: Need for and Access to Health Care and Medicines: Are There Gender Inequities?
Source: PLoS One. 2013 Mar 7;8(3):e57228. doi: 10.1371/journal.pone.0057228 (PMC3591435; doi:10.1371/journal.pone.0057228)
Supplement: Table S5 — Schizophrenia diagnosis and treatment. (XLSX) [file pone.0057228.s005.xlsx]

## Sheet: Table S5
Table S5. Schizophrenia diagnosis and treatment
	Sample size for adults (n)				Ever diagnosed with schizophrenia (%)				Ever treated for schizophrenia among adults ever diagnosed (%)				Received medication/other treatment for schizophrenia in past 2 weeks among adults ever diagnosed (%)
	All		Poor		All		Poor		All		Poor		All		Poor
	Female	Male	Female	Male	Female	Male	Female	Male	Female	Male	Female	Male	Female	Male	Female	Male
East Asia & Pacific
China	2039	1954	789	794	0.401393	0.268479	0.790901	0.705258	24.6297	14.544	15.0611	16.4014	4.89864	0	8.01404	0
Lao People's Democratic Republic	2594	2295	807	766	0.353162	0.360211	0.404805	0.518744	67.1999	82.0678	36.2566	100	34.6549	11.2557	77.009	23.8798
Malaysia	3367	2673	1231	1059	0.212496	0.205204	0.24889	0.234541	84.0434	100	59.3931	n/a	57.2353	66.3214	15.0005	18.3887
Myanmar	3335	2551	1382	985	0.367145	0.299873	0.454984	0.354023	73.0779	65.162	74.5903	12.0377	20.4782	41.3013	24.0969	20.4786
Philippines	5417	4661	2082	1923	0.349901	0.416083	0.441553	0.607986	70.5604	40.6703	64.7339	33.8501	26.5092	40.8004	22.6863	27.7331
Viet Nam	1920	1572	768	628	0.029139	0.1033	0	0.213901	100	100	n/a	100	0	31.0472	n/a	44.1922
Europe & Central Asia
Bosnia-Herzegovina	594	434	248	161	0.0539494	0.135951	0.151561	0.064841	0	100	0	100	0	100	0	100
Croatia	589	401	234	146	1.32882	2.95664	2.82157	4.29132	95.7865	91.852	100	100	78.6922	81.0993	90.2854	91.5081
Czech Republic	516	419	218	148	0.429757	0.573457	0.909396	0	100	n/a	100	n/a	100	n/a	100	n/a
Estonia	645	367	267	136	1.02185	1.84647	0.918139	1.99471	61.8453	100	36.9641	100	61.5105	62.9733	36.0694	100
Georgia	1588	1164	622	437	0.424604	0.551144	1.09064	0.61983	49.3633	50.8268	59.2573	59.6078	17.9987	15.4729	22.4223	45.8225
Hungary	828	591	342	209	2.59539	2.2636	4.23599	3.41971	82.3979	75.9636	84.5565	87.3384	35.443	43.681	47.8102	87.3384
Kazakhstan	2952	1544	1208	580	0.519326	0.451011	0.657069	0.873483	98.9158	97.0429	97.93	95.6453	52.2124	19.7101	56.526	0
Latvia	570	286	229	116	0.192135	1.23457	0.308204	3.02144	100	100	100	100	39.0172	60.5625	0	60.5625
Russia	2828	1593	1175	561	0.503552	0.206624	0.408152	0.403514	95.5628	84.7341	94.7187	89.8105	77.6112	24.0236	94.7187	0
Slovakia	1542	967	495	205	0.150985	n/a	0.297077	0.598647	62.1163	52.6566	61.3184	77.1749	60.0535	52.6566	61.3184	77.1749
Slovenia	314	271	130	105	0.638978	1.47601	0.769231	0.952381	100	100	100	100	50	75	100	100
Spain	3740	2624	1506	1003	0.199744	0.786163	0.587414	0.947297	85.1943	84.5593	83.2834	100	67.0388	46.0536	62.7846	35.6433
Turkey	6416	4801	0	0	n/a	n/a	n/a	n/a	n/a	n/a	n/a	n/a	n/a	n/a	n/a	n/a
Ukraine	1813	988	662	306	0.909553	0.34728	1.38851	0.607895	61.8097	23.2724	70.1632	31.3815	21.2436	23.2724	38.4836	31.3815
Latin America & Caribbean
Brazil	2812	2188	1062	859	2.03667	1.09226	2.70099	1.42175	75.5912	75.8291	74.1777	70.9487	58.1656	48.6995	39.7309	58.3407
Dominican Republic	2430	2104	820	947	1.53241	0.260505	2.21522	0.268821	81.3636	50.7026	84.9131	24.232	13.9642	23.5816	4.36979	0
Ecuador	2579	2045	908	774	1.40298	0.547035	1.04066	0.385398	72.3731	55.0791	62.7815	62.3358	55.0619	51.7585	62.7815	59.3682
Guatemala	2937	1830	984	782	0.344709	0.388457	0.20555	0.518807	n/a	80	n/a	66.6667	n/a	40	n/a	33.3333
Mexico	22369	16377	8909	6473	0.393798	0.322741	0.453207	0.245639	49.1055	62.295	43.0006	56.0007	n/a	n/a	n/a	n/a
Paraguay	2789	2354	1018	1032	0.597763	0.368248	0.206039	0.304495	67.6068	84.2266	100	100	28.7431	24.9383	22.0908	42.5222
Uruguay	1530	1447	564	610	0.782105	0.652251	0.605287	1.02382	69.8792	82.7277	100	76.8848	45.4947	46.7015	25.7197	32.4657
Middle East & North Africa
Morocco	2642	2074	860	768	0.459408	0.884293	0.492128	0.693528	52.8593	10.3426	4.73019	22.5725	2.96013	47.2956	4.73019	0
Tunisia	2723	2342	1112	887	1.57777	2.14943	1.21894	3.29107	58.9422	59.792	65.2146	64.245	34.1456	39.6675	49.9775	33.3665
United Arab Emirates	563	617	227	239	2.373	0.545403	1.94945	1.29173	65.848	76.0828	34.5301	100	36.108	28.5741	61.7908	37.5565
South Asia
Bangladesh	2968	2584	1264	954	0.852355	0.488676	0.826442	0.198321	59.9049	67.4543	50.0804	51.8651	22.6086	48.7222	22.9849	0
India	5142	4843	2095	1904	2.72242	1.96494	3.32366	2.33032	48.4094	43.6589	39.1858	49.7605	21.3976	27.588	19.8985	34.0092
Nepal	4990	3698	1859	1247	2.51778	2.66235	3.27182	2.67722	12.1892	41.8767	3.17406	11.4923	n/a	n/a	n/a	n/a
Pakistan	2812	3567	1107	1386	1.18966	1.02788	1.48764	2.01098	72.3548	46.5644	66.1899	39.109	33.7354	27.6163	36.831	26.0356
Sri Lanka	3596	3136	1436	1212	0.380612	0.892821	0.0834264	0.966069	33.6493	98.1092	95.9323	93.1365	20.6324	73.1213	4.97196	45.5199
Sub-Saharan Africa
Burkina Faso	2550	2272	987	919	1.00543	1.15256	0.95536	1.52926	72.9685	55.3856	79.4733	71.8675	12.4306	51.9143	14.4258	60.6382
Chad	2453	2195	1049	721	3.16158	2.59808	3.68896	1.33585	43.5085	38.0882	53.4385	20.1623	28.895	35.441	45.6143	10.5038
Comoros	972	786	382	292	0.808369	0.784216	0.819186	0.98186	49.3799	48.6404	11.0482	78.8275	49.3799	0	11.0482	0
Congo	1325	1165	499	459	4.01551	4.05936	3.67692	2.44862	70.9292	77.5587	65.857	76.0524	71.0922	60.8982	66.5732	71.6196
Cote d Ivoire	1363	1815	531	677	1.09036	1.149	0.796905	0.658602	33.0912	64.4591	59.1908	82.9984	41.5846	35.1035	59.1908	73.2652
Ethiopia	2546	2392	980	936	1.40126	1.49874	0.885169	1.99156	62.8423	45.0901	60.7921	50.0793	22.497	29.7465	28.5084	21.8536
Ghana	2160	1772	845	655	0.711904	0.669594	0.62658	1.17166	89.8959	70.9363	69.3586	72.9186	57.976	45.9985	17.0719	72.9186
Kenya	2546	1870	1041	714	0.607543	0.805251	0.380564	1.56829	55.1064	42.4417	50.0804	24.0472	19.3307	10.3762	11.5634	11.2921
Malawi	3089	2210	1245	810	1.3034	0.969469	1.51591	1.66213	71.4684	95.8525	58.3259	100	25.3375	40.6378	9.72176	60.4304
Mali	1812	2420	716	875	2.82455	1.22901	4.06407	1.34145	54.13	54.8273	42.5956	35.5335	31.1471	35.6024	25.1267	23.5994
Mauritania	2291	1457	877	433	2.2774	2.6044	1.03299	2.90216	73.6184	86.1116	86.7157	96.2104	78.7957	63.4982	80.6086	76.0938
Mauritius	2016	1872	831	706	0.631381	0.579534	1.11131	1.11069	100	100	100	100	82.6896	70.5474	72.1012	83.7154
Namibia	2525	1723	995	617	3.05532	2.82289	5.03506	3.14899	74.8302	80.2066	66.9545	75.5526	67.114	59.6421	69.0896	50.8552
Senegal	1534	1663	517	551	1.54946	1.13265	1.87676	1.51717	77.4704	87.2907	85.7887	81.5115	26.1972	41.5769	42.4593	18.0025
South Africa	1219	1105	464	403	1.03156	1.28923	1.08524	1.70145	53.5256	54.9496	26.5777	46.9347	41.9529	31.6128	8.20545	40.2293
Swaziland	1666	1404	627	480	7.27734	n/a	7.65101	n/a	36.0956	64.8246	36.7342	64.2159	34.5421	39.2897	30.3241	23.9125
Zambia	2089	1722	911	670	0.448011	0.999884	0.670879	1.16594	57.6864	40.2924	69.5344	83.09	41.0399	49.6278	58.4294	80.7578
Zimbabwe	2593	1479	1038	550	0.9431	0.837362	1.79667	0.676221	64.4493	81.7484	62.4475	81.2571	23.7917	26.4764	7.14592	31.2656
