# Supplementary material for: Need for and Access to Health Care and Medicines: Are There Gender Inequities?
Source: PLoS One. 2013 Mar 7;8(3):e57228. doi: 10.1371/journal.pone.0057228 (PMC3591435; doi:10.1371/journal.pone.0057228)
Supplement: Table S6 — Diabetes diagnosis and treatment. (XLSX) [file pone.0057228.s006.xlsx]

## Sheet: Table S6
Table S6. Diabetes diagnosis and treatment
	Sample size for adults (n)				Ever diagnosed with diabetes (%)				Ever treated for diabetes among adults ever diagnosed (%)				Received medication/other treatment for diabetes in past 2 weeks among adults ever diagnosed (%)
	All		Poor		All		Poor		All		Poor		All		Poor
	Female	Male	Female	Male	Female	Male	Female	Male	Female	Male	Female	Male	Female	Male	Female	Male
East Asia & Pacific
China	2039	1954	789	794	1.39404	1.18242	0.829886	0.57929	96.1217	84.7872	100	75.9508	69.2625	72.5284	67.5786	80.1499
Lao People's Democratic Republic	2594	2295	807	766	0.607313	0.324558	0.234408	0.608616	100	87.7333	100	80.2099	71.3823	20.1712	100	0
Malaysia	3367	2673	1231	1059	5.07837	5.01194	4.66899	2.58826	85.4216	93.5664	93.7669	93.8289	64.1274	68.8303	70.851	62.6711
Myanmar	3335	2551	1382	985	0.418183	0.536765	0	0.604073	88.0954	96.0876	n/a	89.6218	54.1377	66.9186	n/a	72.0329
Philippines	5417	4661	2082	1923	2.29027	1.82024	1.82512	1.33579	68.188	68.7165	45.3132	44.9794	41.4928	46.9417	18.5851	15.3049
Viet Nam	1920	1572	768	628	0.624285	0.0495984	0.338967	0	81.4723	100	100	n/a	31.4046	100	n/a	n/a
Europe & Central Asia
Bosnia-Herzegovina	594	434	248	161	5.26789	4.41247	3.47206	7.98815	91.0888	98.6565	100	100	78.5924	79.9773	87.7698	90.7333
Croatia	589	401	234	146	7.87167	6.9558	12.4727	9.1891	83.0705	82.6279	81.8483	77.442	68.7746	59.3559	61.553	76.3822
Czech Republic	516	419	218	148	10.3585	10.3771	17.2233	22.7106	70.2344	88.8973	63.6218	94.893	39.2984	42.7844	36.9224	43.3612
Estonia	645	367	267	136	4.23375	3.1661	7.76251	4.23856	85.5871	78.6731	81.0934	51.2546	53.917	41.9324	54.4876	39.9685
Georgia	1588	1164	622	437	2.95435	2.15665	2.43908	0.951073	85.2218	83.9519	91.4749	81.4287	47.9814	60.5817	31.6323	35.0273
Hungary	828	591	342	209	10.4805	6.81724	13.1143	8.37959	82.1583	84.584	81.192	86.6176	56.2328	71.573	57.0069	74.3934
Kazakhstan	2952	1544	1208	580	2.45494	1.21245	2.73671	1.24583	81.5943	97.4512	91.3936	100	60.9175	80.0424	63.6903	72.4279
Latvia	570	286	229	116	6.94061	3.71052	8.63668	1.59643	83.6317	96.1538	81.3902	n/a	53.7668	32.9777	40.5258	0
Russia	2828	1593	1175	561	4.50764	1.13323	3.8942	1.68152	60.0466	96.9722	77.6715	94.6397	47.1832	77.5454	61.3587	82.1205
Slovakia	1542	967	495	205	7.29466	n/a	11.9091	21.5984	96.5437	98.9441	99.0809	100	75.294	76.7204	75.837	76.5978
Slovenia	314	271	130	105	6.10932	4.07407	11.7188	4.7619	78.9474	81.8182	73.3333	100	47.3684	54.5455	40	60
Spain	3740	2624	1506	1003	6.90959	6.4966	11.8075	11.1401	78.4656	82.2642	83.2158	85.7773	55.7283	61.9899	63.7267	70.6636
Turkey	6416	4801	0	0	n/a	n/a	n/a	n/a	n/a	n/a	n/a	n/a	n/a	n/a	n/a	n/a
Ukraine	1813	988	662	306	3.94557	2.13336	5.86909	2.59691	92.5747	88.994	91.3533	78.9719	54.6693	68.8049	59.849	47.309
Latin America & Caribbean
Brazil	2812	2188	1062	859	6.54255	4.34884	5.86646	3.62966	84.8359	86.8582	78.1935	74.683	45.3673	42.8043	48.9656	24.4421
Dominican Republic	2430	2104	820	947	4.95596	3.0148	2.83619	2.51805	79.7743	77.1114	62.5576	69.9888	57.5363	51.6354	27.3337	45.1037
Ecuador	2579	2045	908	774	2.04901	1.19405	1.53671	1.14076	79.1084	97.2631	63.1863	95.4232	49.2438	47.8145	65.8733	48.3087
Guatemala	2937	1830	984	782	3.68711	1.88261	1.34021	0.518135	92.4528	93.9394	100	100	46.1538	43.75	66.6667	75
Mexico	22369	16377	8909	6473	n/a	n/a	4.05526	n/a	91.6039	85.879	86.4676	87.4414	58.2862	54.4856	53.1485	59.918
Paraguay	2789	2354	1018	1032	6.02309	2.34651	3.83756	1.42301	79.8649	78.9347	71.8413	58.3074	24.8854	27.3695	21.7805	30.353
Uruguay	1530	1447	564	610	5.24247	4.92205	6.71952	2.61007	86.5033	82.3393	85.345	98.6462	36.6522	26.1459	46.3416	56.6753
Middle East & North Africa
Morocco	2642	2074	860	768	5.55956	2.16188	4.18999	0.869422	66.274	65.4856	56.2579	100	65.9116	56.0916	36.7683	66.1264
Tunisia	2723	2342	1112	887	4.05631	2.99748	2.5903	1.69741	82.0733	84.7011	88.5564	85.6665	61.0642	61.6944	70.2403	52.4741
United Arab Emirates	563	617	227	239	7.2123	6.25111	4.15441	7.52885	87.6031	96.1707	100	100	66.1129	70.8214	49.0212	82.4112
South Asia
Bangladesh	2968	2584	1264	954	2.23034	2.80971	0.991381	2.60539	83.8066	86.6729	76.2215	81.7307	38.3994	45.632	16.139	46.0646
India	5142	4843	2095	1904	1.99066	2.92471	0.953453	1.61901	77.4385	81.7071	61.6252	77.8281	37.1354	48.5352	14.6874	20.1136
Nepal	4990	3698	1859	1247	1.55604	3.83148	0.784022	0.852725	54.1061	54.6426	19.9495	54.1786	28.603	29.1895	n/a	0
Pakistan	2812	3567	1107	1386	3.94468	2.20976	2.64383	0.770632	84.8758	86.7716	76.6119	90.0938	67.7367	76.1517	52.7154	76.9241
Sri Lanka	3596	3136	1436	1212	2.94189	2.40681	2.22869	0.303376	95.8787	92.4664	100	96.825	63.7905	66.1482	47.5213	4.5441
Sub-Saharan Africa
Burkina Faso	2550	2272	987	919	0.507636	0.418806	0.0921743	0.0548866	56.4826	55.1863	100	100	18.828	26.726	100	100
Chad	2453	2195	1049	721	0.885576	2.45368	0.895627	2.65109	16.9785	34.5314	16.9086	5.72787	7.50244	16.0849	8.91366	0
Comoros	972	786	382	292	0.85856	0.617657	0.38196	0.559318	100	100	100	100	51.8354	43.2601	23.5669	41.9336
Congo	1325	1165	499	459	1.60528	2.10863	0.345646	0.852755	93.8749	92.1899	89.135	59.907	85.6448	83.0129	0	59.907
Cote d Ivoire	1363	1815	531	677	1.2829	1.34173	1.54179	1.61021	52.1032	59.0285	65.8343	59.0517	50.132	43.966	61.7023	46.12
Ethiopia	2546	2392	980	936	0.299691	0.48607	0	0.229334	40.9465	83.3884	n/a	47.8991	n/a	59.5334	n/a	0
Ghana	2160	1772	845	655	0.844302	1.02983	0.507253	0.0782957	84.258	96.3771	31.2033	100	71.592	72.5416	47.1831	0
Kenya	2546	1870	1041	714	1.02395	1.50636	0.0754811	0.847829	62.6146	84.688	27.8669	100	54.2337	7.51329	27.8669	0
Malawi	3089	2210	1245	810	0.315606	0.158796	0.345924	0.189912	83.9441	55.1955	100	0	8.81421	5.96147	0	0
Mali	1812	2420	716	875	0.416821	0.309182	0.154281	0	29.7638	76.1702	0	n/a	29.7638	40.7062	0	n/a
Mauritania	2291	1457	877	433	2.23894	1.37306	0.797972	1.82511	44.609	60.4307	26.0451	88.2141	33.7806	57.3822	26.0451	88.2141
Mauritius	2016	1872	831	706	9.5064	8.71201	11.9842	7.77408	95.2145	94.9768	97.573	96.2832	82.4307	85.3166	88.3443	86.3811
Namibia	2525	1723	995	617	2.85001	1.12276	2.67061	1.19724	90.7853	97.4084	92.7026	93.6595	60.9757	59.158	44.1898	52.274
Senegal	1534	1663	517	551	2.28354	0.89134	1.5861	0.070617	58.0665	63.4124	62.6218	100	33.7057	44.8675	24.9312	0
South Africa	1219	1105	464	403	10.9231	6.14193	11.4192	5.72381	81.9578	87.5914	78.3231	90.035	54.5686	52.8887	49.7601	44.9309
Swaziland	1666	1404	627	480	n/a	n/a	4.45107	n/a	72.7465	52.8128	69.1461	36.8816	66.7747	54.6198	51.5178	31.045
Zambia	2089	1722	911	670	0.630561	0.485366	0.720018	1.0436	86.6089	40.3018	91.7204	39.5434	32.4949	23.4818	2.99513	n/a
Zimbabwe	2593	1479	1038	550	0.936684	0.446478	0.611468	0	81.7214	95.7759	100	n/a	18.6832	95.7759	6.49538	n/a
