# Supplementary material for: Need for and Access to Health Care and Medicines: Are There Gender Inequities?
Source: PLoS One. 2013 Mar 7;8(3):e57228. doi: 10.1371/journal.pone.0057228 (PMC3591435; doi:10.1371/journal.pone.0057228)
Supplement: Table S7 — Need for and access to care among adults. (XLSX) [file pone.0057228.s007.xlsx]

## Sheet: Table S7
Table S7. Need for and access to care among adults
	Sample size for adults with need for care in last year (n)				Received care last time adult was in need (%)				Received prescription for medicine if received care (%)
	All		Poor		All		Poor		All		Poor
	Female	Male	Female	Male	Female	Male	Female	Male	Female	Male	Female	Male
East Asia & Pacific
China	154	143	55	71	98.4715	97.6039	95.4992	94.9111	99.4103	99.3198	97.3888	98.7562
Lao People's Democratic Republic	36	36	11	13	91.1771	92.545	79.8231	87.3111	98.7669	90.557	95.1602	85.9348
Malaysia	244	175	82	63	97.7685	97.3217	98.7204	96.4552	58.2755	58.9014	65.6115	68.2859
Myanmar	284	273	108	92	95.9831	95.9436	92.7282	95.3744	98.4489	97.842	97.9632	95.3967
Philippines	150	120	64	39	86.8506	76.4254	88.5974	83.9524	89.7699	83.6585	89.2463	66.0638
Viet Nam	70	79	20	33	98.8478	99.088	98.3527	97.2266	89.7359	87.657	96.0913	94.0391
Europe & Central Asia
Bosnia-Herzegovina	13	16	6	4	87.637	100	100	100	95.9453	100	100	100
Croatia	34	25	11	4	100	100	100	100	92.6014	87.6926	81.8465	55.7511
Czech Republic	47	43	21	15	100	100	100	100	87.7111	91.0948	80.0055	84.229
Estonia	49	19	15	6	97.7697	100	100	100	83.0948	93.5316	86.3325	91.6187
Georgia	25	20	6	5	97.3124	95.6675	80.9388	80.6594	97.5888	100	100	100
Hungary	74	37	21	7	98.2669	100	100	100	98.7575	96.7411	96.1122	95.1234
Kazakhstan	262	165	102	52	99.7392	100	99.3264	100	95.5692	98.727	94.3682	97.5373
Latvia	32	8	15	1	97.0085	89.2681	100	100	100	78.4033	100	0
Russia	253	130	75	40	97.3671	95.1519	98.1871	95.1482	95.578	85.533	92.6364	92.2747
Slovakia	109	48	48	12	100	100	100	100	99.9063	88.0193	99.8624	99.1351
Slovenia	19	13	7	4	94.1176	100	83.3333	100	93.75	61.5385	100	75
Spain	378	255	157	102	99.3326	98.2943	100	100	94.6037	92.7559	95.683	95.4967
Turkey	0	0	0	0	n/a	n/a	n/a	n/a	n/a	n/a	n/a	n/a
Ukraine	137	70	40	21	95.4044	98.3892	93.8224	100	90.6425	94.4104	92.991	91.1502
Latin America & Caribbean
Brazil	0	0	0	0	n/a	n/a	n/a	n/a	n/a	n/a	n/a	n/a
Dominican Republic	60	47	25	22	98.0042	100	92.2457	100	95.5909	97.3665	97.7527	95.5713
Ecuador	129	119	43	39	98.8102	95.6309	100	89.1109	95.1833	95.3321	94.847	98.3235
Guatemala	168	91	65	45	99.3902	100	98.4375	100	96.875	95.5556	95.082	97.7778
Mexico	2450	1722	1001	687	95.4278	92.9499	93.2375	92.3135	97.2622	96.5749	96.7219	97.0813
Paraguay	50	60	16	26	73.9824	69.733	56.9394	50.8206	96.7424	n/a	n/a	n/a
Uruguay	34	33	10	11	96.1913	100	100	100	95.7725	95.7739	90.3493	96.459
Middle East & North Africa
Morocco	122	120	35	29	68.9715	40.1117	33.2834	45.0049	n/a	n/a	n/a	n/a
Tunisia	240	214	80	57	94.522	98.277	96.877	96.3961	100	98.6456	100	96.4668
United Arab Emirates	20	30	5	10	100	98.854	100	95.3069	88.6141	93.0697	100	100
South Asia
Bangladesh	433	506	204	193	95.4719	98.1516	96.1222	99.1136	64.3931	61.7466	62.2815	52.3238
India	863	798	340	325	98.2416	96.6321	97.5345	95.078	88.6775	90.6025	85.8447	87.6065
Nepal	406	305	147	97	76.6455	80.1994	72.5601	80.3033	92.0987	94.6672	87.3151	88.6725
Pakistan	463	721	178	277	96.2377	98.7083	96.7193	98.0412	97.0811	99.3386	97.0318	99.6022
Sri Lanka	384	374	161	150	99.5919	99.9425	99.9304	99.8317	98.3825	97.905	95.1466	95.9851
Sub-Saharan Africa
Burkina Faso	225	188	72	62	94.1147	93.8706	90.5847	89.3064	n/a	n/a	n/a	n/a
Chad	86	107	21	23	87.3737	87.0909	71.7601	65.1834	93.9516	97.6337	n/a	n/a
Comoros	76	67	26	12	96.0397	94.4618	90.3903	91.913	99.1544	98.5267	96.9979	100
Congo	119	110	51	34	94.0521	93.9822	79.4436	86.6752	94.3312	81.2563	90.7144	n/a
Cote d Ivoire	158	208	57	63	95.788	94.8018	92.6083	93.2869	85.7919	86.4064	93.0226	71.6701
Ethiopia	170	189	68	75	79.2157	87.5067	64.1955	86.7334	96.9144	96.4102	n/a	96.1407
Ghana	286	202	84	52	93.6961	94.27	86.0429	90.1869	92.486	95.4452	94.5747	89.8637
Kenya	336	276	146	105	90.1804	87.255	86.6098	85.0591	89.1346	87.973	88.292	77.5793
Malawi	677	517	274	184	81.5791	80.9159	77.7547	77.206	76.9284	77.1779	73.0503	74.4518
Mali	84	105	35	26	95.222	96.155	92.1101	93.1449	n/a	96.4065	n/a	n/a
Mauritania	216	91	66	16	94.8085	92.277	97.9627	90.0503	95.7314	95.2185	96.9585	94.072
Mauritius	213	203	71	82	99.5198	99.6493	98.852	100	99.4607	100	99.3845	100
Namibia	130	99	61	31	98.672	99.2037	97.3396	97.9346	93.0152	90.5249	91.5902	87.8872
Senegal	118	111	33	27	98.4587	98.4489	100	94.9572	81.4268	87.9984	71.3218	79.5234
South Africa	56	48	20	25	97.2003	97.3564	100	95.4792	73.8621	78.1847	80.1355	83.9262
Swaziland	36	30	15	7	98.8773	95.6082	100	86.5383	79.9238	82.7488	72.0397	74.1345
Zambia	519	473	238	186	89.1038	90.0207	92.1889	91.5958	78.3334	76.8421	82.8718	77.8728
Zimbabwe	168	102	71	37	96.1002	97.1743	95.9744	98.8295	78.7797	71.7122	74.5013	68.0902
